# Supplementary material for: Anti-Cholinesterase Combination Drug Therapy as a Potential Treatment for Alzheimer’s Disease
Source: PubMed Central journal article supplement (PMC7913148; doi:10.3390/brainsci11020184), 2021-02-02
Supplement: brainsci-11-00184-s001.pdf [file brainsci-11-00184-s001.pdf]

Supplementary Table S1: Constant ratio experimental design for two-drug combinations.

|        |                                           | Drug 1                       |                                           |                                          |                                       |                                        |                                        |
|--------|-------------------------------------------|------------------------------|-------------------------------------------|------------------------------------------|---------------------------------------|----------------------------------------|----------------------------------------|
|        |                                           | 0                            | 0.25X<br>(ED <sub>50</sub> ) <sub>1</sub> | 0.5X<br>(ED <sub>50</sub> ) <sub>1</sub> | X<br>(ED <sub>50</sub> ) <sub>1</sub> | 2X<br>(ED <sub>50</sub> ) <sub>1</sub> | 4X<br>(ED <sub>50</sub> ) <sub>1</sub> |
| Drug 2 | 0                                         | Control<br>(fa) <sub>0</sub> | (fa) <sub>1</sub>                         | (fa) <sub>1</sub>                        | (fa) <sub>1</sub>                     | (fa) <sub>1</sub>                      | (fa) <sub>1</sub>                      |
|        | 0.25X<br>(ED <sub>50</sub> ) <sub>2</sub> | (fa) <sub>2</sub>            | (fa) <sub>1,2</sub>                       |                                          |                                       |                                        |                                        |
|        | 0.5X<br>(ED <sub>50</sub> ) <sub>2</sub>  | (fa) <sub>2</sub>            |                                           | (fa) <sub>1,2</sub>                      |                                       |                                        |                                        |
|        | X<br>(ED <sub>50</sub> ) <sub>2</sub>     | (fa) <sub>2</sub>            |                                           |                                          | (fa) <sub>1,2</sub>                   |                                        |                                        |
|        | 2X<br>(ED <sub>50</sub> ) <sub>2</sub>    | (fa) <sub>2</sub>            |                                           |                                          |                                       | (fa) <sub>1,2</sub>                    |                                        |
|        | 4X<br>(ED <sub>50</sub> ) <sub>2</sub>    | (fa) <sub>2</sub>            |                                           |                                          |                                       |                                        | (fa) <sub>1,2</sub>                    |

(fa), fractional affect; ED<sub>50</sub>, effective dose producing a 50% effect
